# Supplementary material for: A Tissue Biomarker Panel Predicting Systemic Progression after PSA Recurrence Post-Definitive Prostate Cancer Therapy
Source: PubMed Central journal article supplement (PMC2565588; doi:10.1371/journal.pone.0002318), 2008-05-28
Supplement: pone.0002318.s011.pdf [file pone.0002318.s011.pdf]

**Table S6: Association of genes on chromosome 8 with systemic progression using Gene Set Enrichment Analysis (GSEA).**

---

| Location | Number of genes on panels | Enrichment score (ES) | Normalized ES | Nominal p-value | False discovery rate q-value |
|----------|---------------------------|-----------------------|---------------|-----------------|------------------------------|
| 8p       | 15                        | -0.32                 | -0.85         | 0.65            | 1.00                         |
| 8p23     | 2                         | 0.77                  | 1.15          | 0.30            | 0.36                         |
| 8p22     | 3                         | 0.59                  | 0.99          | 0.53            | 0.55                         |
| 8p21     | 7                         | -0.67                 | -1.43         | 0.10            | 0.27                         |
| 8p12     | 2                         | -0.81                 | -1.22         | 0.21            | 0.51                         |
| 8p11     | 1                         | 0.73                  | 0.95          | 0.59            | 0.54                         |
| 8q       | 75                        | 0.68                  | 1.92          | 3.94E-03        | 2.09E-03                     |
| 8q11     | 1                         | -0.51                 | -0.69         | 0.98            | 1.00                         |
| 8q12     | 3                         | -0.38                 | -0.67         | 0.87            | 0.87                         |
| 8q13     | 1                         | 0.92                  | 1.21          | 0.18            | 0.37                         |
| 8q21     | 5                         | 0.60                  | 1.20          | 0.27            | 0.33                         |
| 8q22     | 4                         | 0.90                  | 1.57          | 8.72E-03        | 4.63E-02                     |
| 8q23     | 4                         | 0.76                  | 1.34          | 0.13            | 0.20                         |
| 8q24     | 57                        | 0.69                  | 1.90          | 2.97E-03        | 1.80E-03                     |
| 8q24.1   | 28                        | 0.85                  | 2.00          | 2.00E-04        | 9.77E-04                     |

---
