# Supplementary material for: A Tissue Biomarker Panel Predicting Systemic Progression after PSA Recurrence Post-Definitive Prostate Cancer Therapy
Source: PLoS One. 2008 May 28;3(5):e2318. doi: 10.1371/journal.pone.0002318 (PMC2565588; doi:10.1371/journal.pone.0002318)
Supplement: Results S1 — The Supplemental Results describe the replicate analysis results, RT-PCR comparisons and inter- and intra-panel gene expression comparisons. (0.05 MB DOC) [file pone.0002318.s005.doc]

**Results S1: Replicate analysis results, RT-PCR comparisons and Inter- and Intra-panel gene expression comparisons**

*Replicate analyses:* The study design included several intra- and inter-run array replicates. To determine inter-run array variability, two specimens were run on each of 8 Cancer Panel v1 array runs. The median (range) inter-run correlation coefficients (r2) comparing these two specimen replicates were 0.94 (0.89 -0.95) and 0.98 (0.90 – 0.98), respectively. The same two specimens were run on each of 8 custom prostate cancer panel array runs. The median (range) inter-run correlation coefficients (r2) comparing these specimen replicates were 0.97 (0.95 – 0.98) and 0.98 (0.96 – 0.99), respectively. Figure S2A summarizes the inter-run replicates for one of the specimens on the custom panel. Twelve specimens were evaluated as intra-run array replicates. The median (range) intra-run r2 values comparing these paired specimens on the Cancer Panel v1 was 0.98 (0.93 – 0.99). The median (range) intra-run r2 values comparing these paired specimens on the custom panel was 0.98 (0.88 – 0.99). Two specimens were serially diluted and the expression results of the diluted RNA specimens compared to that of the standard 200ng of the parental RNA specimen. The r2 for RNA specimens of 25, 50, and 100 ng ranged from 0.98-0.99 (Figure S2B) with slopes near 1.0.

*Comparison with RT-PCR*: RT-PCR analyses were performed for 9 genes (*CDH1, VEGF, MUC1, IGFBP3, ERG, TPD52, YWHAZ, FAM13C1*, and *PAGE4*) on 210 samples. Example results are illustrated in Figure S3. Comparison of the quantitative RT-PCR and the DASL results gave r2 values of 0.72 - 0.94 for genes with dynamic range of at least 7 CTs. Genes with a smaller dynamic range of CT gave r2 values of 0.15-0.79 (Figure S3). Thus, both the DASL and RT-PCR measurements appear to be highly correlated with each other when there is a broad range of RNA expression values.

*Inter- and Intra-Panel Gene Expression Comparisons:* By design several genes were evaluated twice on the custom and/or cancer panels. As an example of a specific inter-panel gene expression comparison, probe sets for *ERG* were present on both the custom (two 3 probe sets) and cancer (one 3 probe set) panels. The r2 comparing the 2 custom probe sets with the commercial probe set for all 596 patients was 0.96 in both cases (Figure S4A). As an example of a specific intra-custom panel gene expression comparison are the probe sets for *SRD5A2* and *terparbo*. *terparbo* is a “novel” gene which is likely a variant of the *SRD5A2* transcript (UCSC browser, http://genome.ucsc.edu). The r2 comparing the two custom probe sets for *SRD5A2* and terparbo was 0.91 (Figure S4B).
