# Supplementary material for: A Tissue Biomarker Panel Predicting Systemic Progression after PSA Recurrence Post-Definitive Prostate Cancer Therapy
Source: PLoS One. 2008 May 28;3(5):e2318. doi: 10.1371/journal.pone.0002318 (PMC2565588; doi:10.1371/journal.pone.0002318)
Supplement: Table S1 — The List of Genes Included on the Commercially Available Illumina DASL Cancer Panel v1. Prostate cancer relevant genes are indicated (for selection criteria see footnotes following Table S2). (0.11 MB XLS) [file pone.0002318.s006.xls]

## Sheet: DASLCancerPanel
Table S1: The List of Genes Included on the Commercially Available Illumina DASLTM Cancer Panel v1. Prostate cancer relevant genes are indicated (for selection criteria see footnotes following Table S2).
Symbol1	Chromosome	Gene Description	Selection Criteria: Associated with Prostate Cancer											Other Controls12
			Mayo/Univ. of MN Partnership Ranking2		Oncomine - PSA Recurrence3	Oncomine4	Literature Review5	Microarray Articles6	Panel Genes7	Mayo/Univ. of MN Partnership Data			Mayo Interest11
			GP3 vs. GP5	GP3 vs. GP5 + Met						No Met. vs. Met.8	Turned On or Off9	Maximum and Minimum10
ABCB1	7	ATP-binding cassette, sub-family B (MDR/TAP), member 1
ABCC2	10	ATP-binding cassette, sub-family C (CFTR/MRP), member 2
ABCG2	4	ATP-binding cassette, sub-family G (WHITE), member 2
ABL1	9	v-abl Abelson murine leukemia viral oncogene homolog 1
AHR	7	aryl hydrocarbon receptor
AIM2	1	absent in melanoma 2
AKT1	14	v-akt murine thymoma viral oncogene homolog 1					X
AKT2	19	v-akt murine thymoma viral oncogene homolog 2
ALK	2	anaplastic lymphoma kinase (Ki-1)
ALOX12	17	arachidonate 12-lipoxygenase
APAF1	12	apoptotic protease activating factor
APC	5	adenomatosis polyposis coli
AR	X	androgen receptor					X
ARAF1	X	v-raf murine sarcoma 3611 viral oncogene homolog 1
AREG	4	amphiregulin (schwannoma-derived growth factor)
ARHGDIB	12	Rho GDP dissociation inhibitor (GDI) beta
ARHI	1	ras homolog gene family, member I (DIRAS3)												X
ARID4A	14	retinoblastoma-binding protein 1 isoform I (RBBP1)
ARNT	1	aryl hydrocarbon receptor nuclear translocator
ATF1	12	activating transcription factor 1
ATM	11	ataxia telangiectasia mutated
AXL	19	AXL receptor tyrosine kinase
BAD	11	BCL2-antagonist of cell death
BAG1	9	BCL2-associated athanogene												X
BAK1	6	BCL2-antagonist/killer 1												X
BARD1	2	BRCA1 associated RING domain 1
BCL2	18	B-cell CLL/lymphoma 2					X
BCL2A1	15	BCL2-related protein A1
BCL2L1	20	BCL2-like 1
BCL3	19	B-cell CLL/lymphoma 3
BCL6	3	B-cell CLL/lymphoma 6 (zinc finger protein 51)
BCR	22	breakpoint cluster region
BIRC2	11	baculoviral IAP repeat-containing 2
BIRC3	11	baculoviral IAP repeat-containing 3
BIRC5	17	baculoviral IAP repeat-containing 5 (survivin)
BLM	15	Bloom syndrome
BMI1	10	B lymphoma Mo-MLV insertion region (mouse)
BMP4	14	bone morphogenetic protein 4
BRAF	7	V-raf murine sarcoma viral oncogene homolog B1
BRCA1	17	breast cancer 1, early onset
Table S1 (continued)
Symbol1	Chromosome	Gene Description	Selection Criteria: Associated with Prostate Cancer											Other Controls12
			Mayo/Univ. of MN Partnership Ranking2		Oncomine - PSA Recurrence3	Oncomine4	Literature Review5	Microarray Articles6	Panel Genes7	Mayo/Univ. of MN Partnership Data			Mayo Interest11
			GP3 vs. GP5	GP3 vs. GP5 + Met						No Met. vs. Met.8	Turned On or Off9	Maximum and Minimum10
BRCA2	13	breast cancer 2, early onset
BTK	X	Bruton agammaglobulinemia tyrosine kinase
CASP10	2	caspase 10, apoptosis-related cysteine protease
CASP2	7	caspase 2, apoptosis-related cysteine protease
CASP3	4	caspase 3, apoptosis-related cysteine protease
CASP8	2	caspase 8, apoptosis-related cysteine protease											X
CAV1	7	caveolin 1, caveolae protein, 22kDa					X
CBFA2T1	8	Core-binding factor, runt domain, alpha subunit 2; cyclin D-related
CBL	11	Cas-Br-M (murine) ecotropic retroviral transforming sequence
CBLB	3	Cas-Br-M (murine) ecotropic retroviral transforming sequence b
CCNA2	4	cyclin A2
CCNC	6	cyclin C												X
CCND1	11	cyclin D1 (PRAD1: parathyroid adenomatosis 1)											X
CCND2	12	cyclin D2
CCND3	6	cyclin D3
CCNE1	19	cyclin E1											X
CCNH	5	cyclin H
CD34	1	CD34 antigen											X
CD44	11	CD44 antigen (homing function and Indian blood group system)	233				X
CD59	11	CD59 antigen p18-20	253
CD9	12	CD9 antigen (p24)
CDC2	10	cell division cycle 2, G1 to S and G2 to M						X
CDC25A	3	cell division cycle 25A
CDC25B	20	cell division cycle 25B
CDC25C	5	cell division cycle 25C						X
CDH1	16	cadherin 1, type 1, E-cadherin (epithelial)					X	X
CDH11	16	cadherin 11, type 2, OB-cadherin (osteoblast)
CDH13	16	cadherin 13, H-cadherin (heart)
CDK10	16	cyclin-dependent kinase (CDC2-like) 10						X
CDK2	12	cyclin-dependent kinase 2
CDK4	12	cyclin-dependent kinase 4
CDK6	7	cyclin-dependent kinase 6
CDK7	5	cyclin-dependent kinase 7 (MO15 homolog, cdk-activating kinase)
CDK9	9	cyclin-dependent kinase 9 (CDC2-related kinase)
CDKN1A	6	cyclin-dependent kinase inhibitor 1A (p21, Cip1)					X
CDKN1B	12	cyclin-dependent kinase inhibitor 1B (p27, Kip1)					X
CDKN2A	9	cyclin-dependent kinase inhibitor 2A (melanoma, p16, inhibits CDK4)	77				X
CDKN2B	9	cyclin-dependent kinase inhibitor 2B (p15, inhibits CDK4)	293
CDKN2C	1	cyclin-dependent kinase inhibitor 2C (p18, inhibits CDK4)
CDKN2D	19	cyclin-dependent kinase inhibitor 2D (p19, inhibits CDK4)
Table S1 (continued)
Symbol1	Chromosome	Gene Description	Selection Criteria: Associated with Prostate Cancer											Other Controls12
			Mayo/Univ. of MN Partnership Ranking2		Oncomine - PSA Recurrence3	Oncomine4	Literature Review5	Microarray Articles6	Panel Genes7	Mayo/Univ. of MN Partnership Data			Mayo Interest11
			GP3 vs. GP5	GP3 vs. GP5 + Met						No Met. vs. Met.8	Turned On or Off9	Maximum and Minimum10
CEACAM1	19	carcinoembryonic antigen-related cell adhesion molecule 1
CEBPA	19	CCAAT/enhancer binding protein (C/EBP), alpha
CHEK1	11	CHK1 checkpoint homolog (S. pombe)
COL18A1	21	collagen, type XVIII, alpha 1
COL1A1	17	collagen, type I, alpha 1		72				X
COL4A3	2	collagen, type IV, alpha 3 (Goodpasture antigen)
COMT	22	catechol-O-methyltransferase
COPEB	10	core promoter element binding protein
CREBBP	16	CREB binding protein (Rubinstein-Taybi syndrome)
CRK	17	v-crk sarcoma virus CT10 oncogene homolog (avian)
CRKL	22	v-crk sarcoma virus CT10 oncogene homolog (avian)-like
CSF1R	5	colony stimulating factor 1 receptor
CSF2	5	colony stimulating factor 2 (granulocyte-macrophage)	130
CSF3	17	colony stimulating factor 3 (granulocyte)
CSF3R	1	colony stimulating factor 3 receptor (granulocyte)
CSK	15	c-src tyrosine kinase
CSPG2	5	chondroitin sulfate proteoglycan 2 (versican)	228	25				X
CTGF	6	connective tissue growth factor
CTNNA1	5	catenin (cadherin-associated protein), alpha 1, 102kDa					X
CTNNB1	3	catenin (cadherin-associated protein), beta 1, 88kDa											X	X
CTSD	11	cathepsin D (lysosomal aspartyl protease)
CTSL	9	cathepsin L
CTTN	11	cortactin isoform a (EMS1)
CUL2	10	cullin 2
CXCL9	4	Chemokine (C-X-C motif) ligand 9
CYP1A1	15	cytochrome P450, family 1, subfamily A, polypeptide 1
CYP1B1	2	cytochrome P450, family 1, subfamily B, polypeptide 1
DAB2	5	Disabled homolog 2, mitogen-responsive phosphoprotein
DAP3	1	death associated protein 3
DAPK1	9	death-associated protein kinase 1
DCC	18	deleted in colorectal carcinoma
DCN	12	decorin
DDB2	11	damage-specific DNA binding protein 2, 48kDa
DDIT3	12	DNA-damage-inducible transcript 3
DDX6	11	DEAD (Asp-Glu-Ala-Asp) box polypeptide 6
DEK	6	DEK oncogene (DNA binding)
DKC1	X	dyskeratosis congenita 1, dyskerin
DLC1	8	deleted in liver cancer 1
DLEU1	13	deleted in lymphocytic leukemia, 1
DLG3	X	discs, large homolog 3 (neuroendocrine-dlg, Drosophila)
Table S1 (continued)
Symbol1	Chromosome	Gene Description	Selection Criteria: Associated with Prostate Cancer											Other Controls12
			Mayo/Univ. of MN Partnership Ranking2		Oncomine - PSA Recurrence3	Oncomine4	Literature Review5	Microarray Articles6	Panel Genes7	Mayo/Univ. of MN Partnership Data			Mayo Interest11
			GP3 vs. GP5	GP3 vs. GP5 + Met						No Met. vs. Met.8	Turned On or Off9	Maximum and Minimum10
DMBT1	10	deleted in malignant brain tumors 1
DSP	6	desmoplakin												X
DTR	5	diphtheria toxin receptor
DVL3	3	dishevelled, dsh homolog 3 (Drosophila)
E2F1	20	E2F transcription factor 1						X
E2F2	1	E2F transcription factor 2
E2F3	6	E2F transcription factor 3
E2F5	8	E2F transcription factor 5, p130-binding
EGF	4	epidermal growth factor (beta-urogastrone)
EGFR	7	epidermal growth factor receptor											X	X
EGR1	5	early growth response 1											X
ELK1	14	ELK1, member of ETS oncogene family
ELK3	12	ELK3, ETS-domain protein (SRF accessory protein 2)
ELL	11	elongation factor RNA polymerase II
ENC1	5	ectodermal-neural cortex (with BTB-like domain)
EPHA1	7	EPH receptor A1												X
EPHB4	7	EPH receptor B4												X
EPO	7	erythropoietin
EPS15	1	epidermal growth factor receptor pathway substrate 15												X
EPS8	12	epidermal growth factor receptor pathway substrate 8
ERBB2	17	v-erb-b2 erythroblastic leukemia viral oncogene homolog 2					X
ERBB3	12	v-erb-b2 erythroblastic leukemia viral oncogene homolog 3 (avian)		331
ERBB4	2	V-erb-a erythroblastic leukemia viral oncogene homolog 4 (avian)
ERCC1	19	Excision repair cross-complementing, complementation group 1
ERCC2	19	excision repair cross-complementing, complementation group 2
ERCC3	2	excision repair cross-complementing, complementation group 3
ERCC4	16	excision repair cross-complementing, complementation group 4
ERCC5	13	excision repair cross-complementing, complementation group 5
ERCC6	10	excision repair cross-complementing, complementation group 6
ERG	21	v-ets erythroblastosis virus E26 oncogene like (avian)									+
ESR1	6	Estrogen receptor 1	351
ETS1	11	v-ets erythroblastosis virus E26 oncogene homolog 1 (avian)
ETS2	21	v-ets erythroblastosis virus E26 oncogene homolog 2 (avian)
ETV1	7	ets variant gene 1										+
ETV6	12	ets variant gene 6 (TEL oncogene)												X
EVI1	3	ecotropic viral integration site 1
EVI2A	17	Ecotropic viral integration site 2A
EXT1	8	exostoses (multiple) 1
EXT2	11	exostoses (multiple) 2
FANCA	16	Fanconi anemia, complementation group A
Table S1 (continued)
Symbol1	Chromosome	Gene Description	Selection Criteria: Associated with Prostate Cancer											Other Controls12
			Mayo/Univ. of MN Partnership Ranking2		Oncomine - PSA Recurrence3	Oncomine4	Literature Review5	Microarray Articles6	Panel Genes7	Mayo/Univ. of MN Partnership Data			Mayo Interest11
			GP3 vs. GP5	GP3 vs. GP5 + Met						No Met. vs. Met.8	Turned On or Off9	Maximum and Minimum10
FANCG	9	Fanconi anemia, complementation group G
FAT	4	FAT tumor suppressor homolog 1 (Drosophila)
FER	5	fer (fps/fes related) tyrosine kinase (phosphoprotein NCP94)
FES	15	feline sarcoma oncogene
FGF1	5	fibroblast growth factor 1 (acidic)
FGF12	3	fibroblast growth factor 12
FGF2	4	fibroblast growth factor 2 (basic)											X
FGF3	11	fibroblast growth factor 3
FGF5	4	fibroblast growth factor 5
FGF6	12	fibroblast growth factor 6
FGF7	15	fibroblast growth factor 7 (keratinocyte growth factor)
FGF8	10	fibroblast growth factor 8 (androgen-induced)
FGF9	13	fibroblast growth factor 9 (glia-activating factor)
FGFR1	8	Fibroblast growth factor receptor 1
FGFR2	10	fibroblast growth factor receptor 2							X		-
FGFR3	4	fibroblast growth factor receptor 3
FGFR4	5	fibroblast growth factor receptor 4
FGR	1	Gardner-Rasheed feline sarcoma viral (v-fgr) oncogene homolog
FHIT	3	fragile histidine triad gene
FLI1	11	Friend leukemia virus integration 1
FLT1	13	fms-related tyrosine kinase 1
FLT3	13	fms-related tyrosine kinase 3
FLT4	5	fms-related tyrosine kinase 4
FOLR1	11	folate receptor 1 (adult)
FOS	14	v-fos FBJ murine osteosarcoma viral oncogene homolog							X
FOSB	19	FBJ murine osteosarcoma viral oncogene homolog B				X
FOSL2	2	FOS-like antigen 2
FRAP1	1	FK506 binding protein 12-rapamycin associated protein 1
FRZB	2	frizzled-related protein		300
FVT1	18	Follicular lymphoma variant translocation 1
FYN	6	FYN oncogene related to SRC, FGR, YES
FZD7	2	frizzled homolog 7 (Drosophila)
G22P1	22	thyroid autoantigen 70kDa (Ku antigen)
GADD45A	1	growth arrest and DNA-damage-inducible, alpha
GAS1	9	growth arrest-specific 1
GAS7	17	growth arrest-specific 7
GFI1	1	growth factor independent 1
GLI	12	glioma-associated oncogene homolog (zinc finger protein)
GLI2	2	GLI-Kruppel family member GLI2
GLI3	7	GLI-Kruppel family member GLI3
Table S1 (continued)
Symbol1	Chromosome	Gene Description	Selection Criteria: Associated with Prostate Cancer											Other Controls12
			Mayo/Univ. of MN Partnership Ranking2		Oncomine - PSA Recurrence3	Oncomine4	Literature Review5	Microarray Articles6	Panel Genes7	Mayo/Univ. of MN Partnership Data			Mayo Interest11
			GP3 vs. GP5	GP3 vs. GP5 + Met						No Met. vs. Met.8	Turned On or Off9	Maximum and Minimum10
GML	8	GPI anchored molecule like protein
GRB2	17	growth factor receptor-bound protein 2												X
GRB7	17	growth factor receptor-bound protein 7												X
GRPR	X	gastrin-releasing peptide receptor
GSTP1	11	glutathione S-transferase pi					X
HCK	20	hemopoietic cell kinase
HDAC1	1	histone deacetylase 1
HDGF	1	hepatoma-derived growth factor (high-mobility group protein 1-like)
HIF1A	14	hypoxia-inducible factor 1, alpha subunit
HLF	17	hepatic leukemia factor
HMMR	5	hyaluronan-mediated motility receptor (RHAMM)
HOXA9	7	homeo box A9
HRAS	11	v-Ha-ras Harvey rat sarcoma viral oncogene homolog
ICAM1	19	intercellular adhesion molecule 1 (CD54), human rhinovirus receptor
IFNG	12	interferon, gamma
IFNGR1	6	interferon gamma receptor 1
IFNGR2	21	interferon gamma receptor 2 (interferon gamma transducer 1)												X
IGF1	12	insulin-like growth factor 1 (somatomedin C)					X
IGF1R	15	Insulin-like growth factor 1 receptor		179
IGF2	11	Insulin-like growth factor 2 (somatomedin A)					X
IGF2R	6	insulin-like growth factor 2 receptor
IGFBP1	7	insulin-like growth factor binding protein 1
IGFBP2	2	insulin-like growth factor binding protein 2, 36kDa		106			X	X
IGFBP3	7	insulin-like growth factor binding protein 3	138	10			X		X
IGFBP5	2	insulin-like growth factor binding protein 5						X
IGFBP6	12	insulin-like growth factor binding protein 6												X
IL11	19	interleukin 11
IL12A	3	interleukin 12A
IL12B	5	interleukin 12B
IL13	5	interleukin 13	494
IL1A	2	interleukin 1, alpha
IL1B	2	interleukin 1, beta
IL1RN	2	interleukin 1 receptor antagonist
IL2	4	interleukin 2
IL3	5	interleukin 3 (colony-stimulating factor, multiple)
IL4	5	interleukin 4
IL6	7	interleukin 6 (interferon, beta 2)					X
IL8	4	interleukin 8											X
ILK	11	integrin-linked kinase
ING1	13	Inhibitor of growth family, member 1
Table S1 (continued)
Symbol1	Chromosome	Gene Description	Selection Criteria: Associated with Prostate Cancer											Other Controls12
			Mayo/Univ. of MN Partnership Ranking2		Oncomine - PSA Recurrence3	Oncomine4	Literature Review5	Microarray Articles6	Panel Genes7	Mayo/Univ. of MN Partnership Data			Mayo Interest11
			GP3 vs. GP5	GP3 vs. GP5 + Met						No Met. vs. Met.8	Turned On or Off9	Maximum and Minimum10
INHA	2	inhibin, alpha
IRF1	5	interferon regulatory factor 1
ITGB1	10	integrin, beta 1
ITGB4	17	integrin, beta 4
JAK2	9	Janus kinase 2 (a protein tyrosine kinase)
JARID1B	1	retinoblastoma binding protein 2 homolog 1 (RBBP2)
JUN	1	v-jun sarcoma virus 17 oncogene homolog (avian)												X
JUNB	19	jun B proto-oncogene							X
JUND	19	jun D proto-oncogene												X
KAI1	11	kangai 1					X
KDR	4	kinase insert domain receptor (a type III receptor tyrosine kinase)
KIT	4	v-kit Hardy-Zuckerman 4 feline sarcoma viral oncogene homolog											X
KRAS2	12	V-Ki-ras2 Kirsten rat sarcoma 2 viral oncogene homolog
L1CAM	X	L1 cell adhesion molecule
LAF4	2	Lymphoid nuclear protein related to AF4
LAMB1	7	laminin, beta 1
LCK	1	lymphocyte-specific protein tyrosine kinase
LCN2	9	lipocalin 2 (oncogene 24p3)
LIF	22	leukemia inhibitory factor (cholinergic differentiation factor)
LIG1	19	ligase I, DNA, ATP-dependent
LIG3	17	ligase III, DNA, ATP-dependent
LIG4	13	ligase IV, DNA, ATP-dependent
LMO1	11	LIM domain only 1 (rhombotin 1)
LMO2	11	LIM domain only 2 (rhombotin-like 1)
LTA	6	lymphotoxin alpha (TNF superfamily, member 1)
LYN	8	v-yes-1 Yamaguchi sarcoma viral related oncogene homolog
MAD	2	MAX dimerization protein 1												X
MAF	16	v-maf musculoaponeurotic fibrosarcoma oncogene homolog (avian)
MALT1	18	mucosa associated lymphoid tissue lymphoma translocation gene 1	270	69
MAP3K8	10	mitogen-activated protein kinase kinase kinase 8
MAPK10	4	mitogen-activated protein kinase 10
MAPK14	6	mitogen-activated protein kinase 14
MAS1	6	MAS1 oncogene
MATK	19	megakaryocyte-associated tyrosine kinase	194
MBD2	18	methyl-CpG binding domain protein 2
MCAM	11	melanoma cell adhesion molecule
MCC	5	mutated in colorectal cancers
MCF2	X	MCF.2 cell line derived transforming sequence
MCL1	1	myeloid cell leukemia sequence 1 (BCL2-related)
MDM4	1	Mdm4, transformed 3T3 cell double minute 4, p53 binding protein
Table S1 (continued)
Symbol1	Chromosome	Gene Description	Selection Criteria: Associated with Prostate Cancer											Other Controls12
			Mayo/Univ. of MN Partnership Ranking2		Oncomine - PSA Recurrence3	Oncomine4	Literature Review5	Microarray Articles6	Panel Genes7	Mayo/Univ. of MN Partnership Data			Mayo Interest11
			GP3 vs. GP5	GP3 vs. GP5 + Met						No Met. vs. Met.8	Turned On or Off9	Maximum and Minimum10
MDS1	3	myelodysplasia syndrome 1
MEN1	11	multiple endocrine neoplasia I
MET	7	met proto-oncogene (hepatocyte growth factor receptor)					X
MLF1	3	Myeloid leukemia factor 1
MLF2	12	myeloid leukemia factor 2
MLH1	3	mutL homolog 1, colon cancer, nonpolyposis type 2 (E. coli)											X
MLL	11	myeloid/lymphoid or mixed-lineage leukemia												X
MLLT3	9	myeloid/lymphoid or mixed-lineage leukemia; translocated to, 3
MLLT4	6	myeloid/lymphoid or mixed-lineage leukemia; translocated to, 4												X
MLLT6	8	myeloid/lymphoid or mixed-lineage leukemia; translocated to, 6
MMP1	11	matrix metalloproteinase 1 (interstitial collagenase)
MMP10	11	matrix metalloproteinase 10 (stromelysin 2)
MMP14	14	matrix metalloproteinase 14 (membrane-inserted)
MMP2	16	matrix metalloproteinase 2 (gelatinase A)					X
MMP3	11	matrix metalloproteinase 3 (stromelysin 1, progelatinase)
MMP7	11	matrix metalloproteinase 7 (matrilysin, uterine)
MMP9	20	matrix metalloproteinase 9 (gelatinase B)
MOS	8	v-mos Moloney murine sarcoma viral oncogene homolog
MPL	1	myeloproliferative leukemia virus oncogene
MRE11A	11	MRE11 meiotic recombination 11 homolog A (S. cerevisiae)
MSF	17	MLL septin-like fusion
MSH2	2	mutS homolog 2, colon cancer, nonpolyposis type 1 (E. coli)					X
MSH3	5	mutS homolog 3 (E. coli)
MSH6	2	mutS homolog 6 (E. coli)
MST1R	3	macrophage stimulating 1 receptor (c-met-related tyrosine kinase)
MTA1	14	Metastasis associated 1					X	X
MTHFR	1	5,10-methylenetetrahydrofolate reductase (NADPH)												X
MUC1	1	mucin 1, transmembrane						X
MXI1	10	MAX interactor 1					X
MYB	6	v-myb myeloblastosis viral oncogene homolog (avian)
MYBL2	20	v-myb myeloblastosis viral oncogene homolog (avian)-like 2						X
MYC	8	v-myc myelocytomatosis viral oncogene homolog (avian)					X							X
MYCL1	1	v-myc myelocytomatosis viral oncogene homolog 1
MYCL2	X	L-myc-2
MYCN	2	v-myc myelocytomatosis viral related oncogene												X
NAT2	8	N-acetyltransferase 2 (arylamine N-acetyltransferase)
NBS1	8	Nijmegen breakage syndrome 1 (nibrin)
NEO1	15	neogenin homolog 1 (chicken)		392
NF1	17	neurofibromin 1
NFKB1	4	nuclear factor of kappa light polypeptide gene enhancer in B-cells 1
Table S1 (continued)
Symbol1	Chromosome	Gene Description	Selection Criteria: Associated with Prostate Cancer											Other Controls12
			Mayo/Univ. of MN Partnership Ranking2		Oncomine - PSA Recurrence3	Oncomine4	Literature Review5	Microarray Articles6	Panel Genes7	Mayo/Univ. of MN Partnership Data			Mayo Interest11
			GP3 vs. GP5	GP3 vs. GP5 + Met						No Met. vs. Met.8	Turned On or Off9	Maximum and Minimum10
NFKB2	10	nuclear factor of kappa light polypeptide gene enhancer in B-cells 2											X
NFKBIA	14	nuclear factor of K lt. polypeptide gene enhancer in B-cells inhibitor, a
NGFR	17	nerve growth factor receptor (TNFR superfamily, member 16)
NOS3	7	nitric oxide synthase 3 (endothelial cell)
NOTCH1	9	Notch homolog 1, translocation-associated (Drosophila)
NOTCH2	1	Notch homolog 2 (Drosophila)
NOTCH4	6	Notch homolog 4 (Drosophila)
NQO1	16	NAD(P)H dehydrogenase, quinone 1
NRAS	1	neuroblastoma RAS viral (v-ras) oncogene homolog
NTRK1	1	neurotrophic tyrosine kinase, receptor, type 1
NTRK2	9	neurotrophic tyrosine kinase, receptor, type 2
NTRK3	15	neurotrophic tyrosine kinase, receptor, type 3
NUMA1	11	nuclear mitotic apparatus protein 1
OGG1	3	8-oxoguanine DNA glycosylase
OSM	22	oncostatin M											X
PARP1	1	poly (ADP-ribose) polymerase family, member 1 (ADPRT)
PBX1	1	pre-B-cell leukemia transcription factor 1
PCNA	20	proliferating cell nuclear antigen
PCTK1	X	PCTAIRE protein kinase 1
PDGFA	7	platelet-derived growth factor alpha polypeptide
PDGFB	22	platelet-derived growth factor beta polypeptide (v-sis oncogene)
PDGFRA	4	platelet-derived growth factor receptor, alpha polypeptide												X
PDGFRB	5	platelet-derived growth factor receptor, beta polypeptide						X	X
PGF	14	placental growth factor												X
PGR	11	progesterone receptor
PIK3CA	3	phosphoinositide-3-kinase, catalytic, alpha polypeptide
PIM1	6	pim1 oncogene					X	X
PLA2G2A	1	phospholipase A2, group IIA (platelets, synovial fluid)
PLAG1	8	pleiomorphic adenoma gene 1
PLAT	8	plasminogen activator, tissue
PLAUR	19	plasminogen activator, urokinase receptor
PLG	6	plasminogen
PML	15	promyelocytic leukemia
PMS1	2	PMS1 postmeiotic segregation increased 1 (S. cerevisiae)
PPARD	6	peroxisome proliferative activated receptor, delta
PPARG	3	peroxisome proliferative activated receptor, gamma
PPP2R1B	11	Protein phosphatase 2, regulatory subunit A, beta isoform
PRCC	1	papillary renal cell carcinoma (translocation-associated)
PRKAR1A	17	protein kinase, cAMP-dependent, regulatory, type I, alpha
PRKR	2	protein kinase, interferon-inducible double stranded RNA dependent
Table S1 (continued)
Symbol1	Chromosome	Gene Description	Selection Criteria: Associated with Prostate Cancer											Other Controls12
			Mayo/Univ. of MN Partnership Ranking2		Oncomine - PSA Recurrence3	Oncomine4	Literature Review5	Microarray Articles6	Panel Genes7	Mayo/Univ. of MN Partnership Data			Mayo Interest11
			GP3 vs. GP5	GP3 vs. GP5 + Met						No Met. vs. Met.8	Turned On or Off9	Maximum and Minimum10
PTCH	9	Patched homolog (Drosophila)
PTCH2	1	patched homolog 2 (Drosophila)												X
PTEN	10	phosphatase and tensin homolog					X	X
PTGS1	9	prostaglandin-endoperoxide synthase 1
PTGS2	1	prostaglandin-endoperoxide synthase 2
PTHLH	12	parathyroid hormone-like hormone
PTK2	8	PTK2 protein tyrosine kinase 2
PTK7	6	PTK7 protein tyrosine kinase 7
PTPRF	1	protein tyrosine phosphatase, receptor type, F
PTPRG	3	protein tyrosine phosphatase, receptor type, G
PTPRH	19	protein tyrosine phosphatase, receptor type, H
PURA	5	purine-rich element binding protein A												X
PXN	12	paxillin
QARS	3	glutaminyl-tRNA synthetase
RAB8A	19	mel transforming oncogene (MEL)												X
RAD23A	19	RAD23 homolog A (S. cerevisiae)
RAD50	5	RAD50 homolog (S. cerevisiae)
RAD51	15	RAD51 homolog (RecA homolog, E. coli) (S. cerevisiae)
RAD52	12	RAD52 homolog (S. cerevisiae)
RAD54B	8	Fibrinogen silencer binding protein
RAD54L	1	RAD54-like (S. cerevisiae)
RAF1	3	v-raf-1 murine leukemia viral oncogene homolog 1
RALB	2	v-ral simian leukemia viral oncogene homolog B
RAN	6	RAN, member RAS oncogene family
RAP1A	1	RAP1A, member of RAS oncogene family						X
RAP1GDS1	4	RAP1, GTP-GDP dissociation stimulator 1
RAP2A	13	Ras-related protein Rap-2a (RbBP-30).
RARA	15	Retinoic acid receptor, alpha	429											X
RARB	3	retinoic acid receptor, beta
RASA1	5	RAS p21 protein activator (GTPase activating protein) 1
RB1	13	retinoblastoma 1 (including osteosarcoma)					X
RBBP5	1	retinoblastoma binding protein 5
RBBP6	16	retinoblastoma binding protein 6
RBL2	16	retinoblastoma-like 2 (p130)
RECQL	11	RecQ protein-like (DNA helicase Q1-like)
REL	2	v-rel reticuloendotheliosis viral oncogene homolog (avian)
RELA	11	v-rel reticuloendotheliosis viral oncogene homolog A												X
RET	10	ret proto-oncogene
RHOA	3	ras homolog gene family, member A (ARHA)												X
RHOH	4	ras homolog gene family, member H (ARHH)
Table S1 (continued)
Symbol1	Chromosome	Gene Description	Selection Criteria: Associated with Prostate Cancer											Other Controls12
			Mayo/Univ. of MN Partnership Ranking2		Oncomine - PSA Recurrence3	Oncomine4	Literature Review5	Microarray Articles6	Panel Genes7	Mayo/Univ. of MN Partnership Data			Mayo Interest11
			GP3 vs. GP5	GP3 vs. GP5 + Met						No Met. vs. Met.8	Turned On or Off9	Maximum and Minimum10
RIPK1	6	receptor (TNFRSF)-interacting serine-threonine kinase 1												X
RLF	1	rearranged L-myc fusion sequence
ROS1	6	v-ros UR2 sarcoma virus oncogene homolog 1 (avian)
RRAS	19	related RAS viral (r-ras) oncogene homolog
S100A4	1	S100 calcium binding protein A4
SEMA3F	3	sema domain, immunoglobulin domain (Ig), short basic domain, 3F	406	470
SEPT5	22	Septin 5 (Peanut-like protein 1) (CDCREL-1) (PNUTL1)
SERPINE1	7	serine (or cysteine) proteinase inhibitor, clade E, member 1
SH3BP2	4	SH3-domain binding protein 2
SHH	7	sonic hedgehog homolog (Drosophila)
SIAH1	16	seven in absentia homolog 1 (Drosophila)
SKI	1	v-ski sarcoma viral oncogene homolog (avian)
SKIL	3	SKI-like												X
SMAD2	18	Sma- and Mad-related protein 2 (MADH2)
SMAD4	18	SMAD, mothers against DPP homolog 4 (Drosophila) (MADH4)
SMARCA4	19	SWI/SNF related, matrix assoc., actin dependent reg. of chromatin, a4
SMARCB1	22	SWI/SNF related, matrix assoc., actin dependent reg. of chromatin, b1
SOD1	21	superoxide dismutase 1, soluble (amyotrophic lateral sclerosis 1 (adult))												X
SPARC	5	secreted protein, acidic, cysteine-rich (osteonectin)						X
SPI1	11	spleen focus forming virus (SFFV) proviral integration oncogene spi1
SPP1	4	secreted phosphoprotein 1
SRC	20	v-src sarcoma (Schmidt-Ruppin A-2) viral oncogene homolog (avian)
STAT1	2	signal transducer and activator of transcription 1, 91kDa
STAT3	17	signal transducer and activator of transcription 3
STAT5B	17	signal transducer and activator of transcription 5B					X	X
STK11	19	serine/threonine kinase 11 (Peutz-Jeghers syndrome)	127
SYK	9	Spleen tyrosine kinase		108
TAL1	1	T-cell acute lymphocytic leukemia 1
TCF7L2	10	transcription factor 7-like 2 (T-cell specific, HMG-box)
TDGF1	3	teratocarcinoma-derived growth factor 1
TEK	9	TEK tyrosine kinase, endothelial
TERT	5	telomerase reverse transcriptase					X
TFAP2C	20	transcription factor AP-2 gamma
TFDP1	13	transcription factor Dp-1
TFE3	X	transcription factor binding to IGHM enhancer 3
TFF1	21	trefoil factor 1
TFG	3	TRK-fused gene												X
TFRC	3	transferrin receptor (p90, CD71)												X
TGFA	2	transforming growth factor, alpha
TGFB1	19	transforming growth factor, beta 1 (Camurati-Engelmann disease)					X
Table S1 (continued)
Symbol1	Chromosome	Gene Description	Selection Criteria: Associated with Prostate Cancer											Other Controls12
			Mayo/Univ. of MN Partnership Ranking2		Oncomine - PSA Recurrence3	Oncomine4	Literature Review5	Microarray Articles6	Panel Genes7	Mayo/Univ. of MN Partnership Data			Mayo Interest11
			GP3 vs. GP5	GP3 vs. GP5 + Met						No Met. vs. Met.8	Turned On or Off9	Maximum and Minimum10
TGFB2	1	transforming growth factor, beta 2
TGFB3	14	transforming growth factor, beta 3			X			X
TGFBI	5	transforming growth factor, beta-induced, 68kDa
TGFBR1	9	transforming growth factor, beta receptor I
TGFBR2	3	transforming growth factor, beta receptor II (70/80kDa)
TGFBR3	1	transforming growth factor, beta receptor III (betaglycan, 300kDa)												X
THBS2	6	thrombospondin 2	150	55
THPO	3	thrombopoietin
TIAM1	21	T-cell lymphoma invasion and metastasis 1								X
TIMP1	X	tissue inhibitor of metalloproteinase 1											X	X
TIMP2	17	tissue inhibitor of metalloproteinase 2						X					X
TIMP3	22	tissue inhibitor of metalloproteinase 3
TK1	17	thymidine kinase 1, soluble
TNF	6	tumor necrosis factor (TNF superfamily, member 2)
TNFAIP1	17	tumor necrosis factor, alpha-induced protein 1 (endothelial)
TNFRSF10A	8	tumor necrosis factor receptor superfamily, member 10a
TNFRSF10B	8	tumor necrosis factor receptor superfamily, member 10b
TNFRSF1A	12	tumor necrosis factor receptor superfamily, member 1A	82
TNFRSF1B	1	tumor necrosis factor receptor superfamily, member 1B
TNFRSF5	20	tumor necrosis factor receptor superfamily, member 5
TNFRSF6	10	tumor necrosis factor receptor superfamily, member 6
TNFSF10	3	tumor necrosis factor (ligand) superfamily, member 10
TNFSF6	1	tumor necrosis factor (ligand) superfamily, member 6
TNFSF8	9	tumor necrosis factor (ligand) superfamily, member 8
TOP1	1	topoisomerase (DNA) I
TOP2A	17	topoisomerase (DNA) II alpha 170kDa						X
TP53	17	tumor protein p53 (Li-Fraumeni syndrome)					X
TP73	1	tumor protein p73
TPR	1	translocated promoter region (to activated MET oncogene)						X
TRAF3	14	TNF receptor-associated factor 3
TRAF4	17	TNF receptor-associated factor 4
TSC1	9	tuberous sclerosis 1												X
TSC2	16	tuberous sclerosis 2
TSG101	11	tumor susceptibility gene 101
TYMS	18	thymidylate synthetase
TYRO3	15	TYRO3 protein tyrosine kinase						X
VAV1	19	vav 1 oncogene
VAV2	9	vav 2 oncogene			X
VBP1	X	von Hippel-Lindau binding protein 1
VEGF	6	vascular endothelial growth factor					X
Table S1 (continued)
Symbol1	Chromosome	Gene Description	Selection Criteria: Associated with Prostate Cancer											Other Controls12
			Mayo/Univ. of MN Partnership Ranking2		Oncomine - PSA Recurrence3	Oncomine4	Literature Review5	Microarray Articles6	Panel Genes7	Mayo/Univ. of MN Partnership Data			Mayo Interest11
			GP3 vs. GP5	GP3 vs. GP5 + Met						No Met. vs. Met.8	Turned On or Off9	Maximum and Minimum10
VEGFB	11	vascular endothelial growth factor B												X
VHL	3	von Hippel-Lindau tumor suppressor
VIL2	6	villin 2 (ezrin)
WEE1	11	WEE1 homolog (S. pombe)	10	61
WNT1	12	wingless-type MMTV integration site family, member 1
WNT10B	12	wingless-type MMTV integration site family, member 10B
WNT2	7	wingless-type MMTV integration site family member 2										+
WNT2B	1	wingless-type MMTV integration site family, member 2B
WNT5A	3	wingless-type MMTV integration site family, member 5A							X
WNT8B	10	wingless-type MMTV integration site family, member 8B
WRN	8	Werner syndrome
WT1	11	Wilms tumor 1
XPA	9	xeroderma pigmentosum, complementation group A
XPC	3	xeroderma pigmentosum, complementation group C						X
XRCC1	19	X-ray repair complementing defective repair in Chinese hamster cells 1
XRCC2	7	X-ray repair complementing defective repair in Chinese hamster cells 2
XRCC4	5	X-ray repair complementing defective repair in Chinese hamster cells 4
XRCC5	2	X-ray repair complementing defective repair in Chinese hamster cells 5
YES1	18	v-yes-1 Yamaguchi sarcoma viral oncogene homolog 1
YY1	14	YY1 transcription factor
ZNF146	19	zinc finger protein 146
ZNFN1A1	7	Zinc finger protein, subfamily 1A, 1 (Ikaros)
