# Supplementary material for: A Tissue Biomarker Panel Predicting Systemic Progression after PSA Recurrence Post-Definitive Prostate Cancer Therapy
Source: PLoS One. 2008 May 28;3(5):e2318. doi: 10.1371/journal.pone.0002318 (PMC2565588; doi:10.1371/journal.pone.0002318)
Supplement: Table S2 — Genes Relevant to Prostate Cancer Progression Included on an Illumina DASL Custom Array (for selection criteria see footnotes below). (0.16 MB XLS) [file pone.0002318.s007.xls]

## Sheet: ProstateCustomPanelV2
Table S2: Genes Relevant to Prostate Cancer Progression Included on an Illumina DASLTM Custom Array (for selection criteria see footnotes below).
Symbol1	Chromosome	Gene Description	Selection Criteria: Associated with Prostate Cancer											Other Controls12
			Mayo/Univ. of MN Partnership Ranking2		Oncomine - PSA Recurrence3	Oncomine4	Literature Review5	Microarray Articles6	Panel Genes7	Mayo/Univ. of MN Partnership Data			Mayo Interest11
			GP3 vs. GP5	GP3 vs. GP5 + Met						No Met. vs. Met.8	Turned On or Off9	Maximum or Minimum10
1557685_at	8	Equivilent to kimore											X
1560225_at	6	Intron region near exon 1 of CNR1.a										+
1561073_at	8	Intron region downstream of exon 5 of TRPS1											X
213310_at	8	Part of 3'-UTR of rase.a, downstream of EIF2C2											X
214174_s_at	5	Within intron region of P4HA2	37
214384_s_at	12	Immediately downstream of DCTN2	8
216584_at	1	About 15 kb upstream of FRAP1	19
225311_at	15	About 2kb downstream of IVD								X
228178_s_at	16	About 1.5kb downstream of HAS3	48
228687_at	7		63
228798_x_at	16	About 6.5kb upstream of C16orf54	5
229455_at	8	about 1kb upstream of stuskeybu.a											X
231181_at	8	about 2kb downstream of PKHD1L1											X
231651_at	17	about 0.3kb upstream of FLJ40342	49
233424_at	2	Within intron 1 of NRXN1										+
235196_at	1	About 1kb downstream of CDC73								X
236338_at	13	Within intron of IRS2									-
236472_at	1	Within intron of OSBPL9								X
240093_x_at	8	Within intron 1 of FLJ20366											X
240236_at	3	About 4 kb downstream of STXBP5L.a										+
240543_at	8	Within intron of PTK2											X
241944_x_at	12	Within intron of TNFRSF1A	82
242763_at	8	Within intron of PKHD1L1											X
243636_s_at	4	Within intron of SH3D19	241	59
244579_at	8	Within intron of TRPS1											X
AA621488	14	Within intron of SMEK1							X
AAK1	2	AP2 associated kinase 1	56
ABCA5	17	ATP-binding cassette, sub-family A , member 5						X
ABCC5	3	ATP-binding cassette, sub-family C, member 5	238	18
ACACA	17	acetyl-Coenzyme A carboxylase alpha						X
ACOX1	17	acyl-Coenzyme A oxidase 1; palmitoyl		75
ACP2	11	acid phosphatase 2; lysosomal	120	56
ACPP	3	acid phosphatase; prostate											X
ACTG2	2	actin; gamma 2; smooth muscle; enteric										-
ACY3	11	aspartoacylase (aminocyclase) 3										+
ADCK5	8	aarF domain containing kinase 5											X
AF119310	8												X
AFF4	5	ALL1 fused gene from 5q31							X
AI015000	3								X
AI017592	18								X
Table S2 (continued)
Gene Symbol1	Chromosome	Gene Description	Selection Criteria: Associated with Prostate Cancer											Other Controls12
			Mayo/Univ. of MN Partnership Ranking2		Oncomine - PSA Recurrence3	Oncomine4	Literature Review5	Microarray Articles6	Panel Genes7	Mayo/Univ. of MN Partnership Data			Mayo Interest11
			GP3 vs. GP5	GP3 vs. GP5 + Met						No Met. vs. Met.8	Turned On or Off9	Maximum or Minimum10
AI288607	1	Corresponds to rorklor.a							X
AI431618	19								X
AI767512	6	About 3kb downstream of RAB22; Within slorspoyby.a							X
AI791860	5	Corresponds to C19orf2.e	79	202
AI821573	10								X
ALAS1	3	aminolevulinate; delta-; synthase 1												X
ALCAM	3	activated leukocyte cell adhesion molecule						X
ALDH1A2	15	aldehyde dehydrogenase 1 family; member A2							X
ALOX15B	17	arachidonate 15-lipoxygenase; type B									-
AMACR	5	alpha-methylacyl-CoA racemase					X	X
ANGPT2	8	angiopoietin 2						X	X
ANK3	10	ankyrin 3							X
ANPEP	15	alanyl (membrane) aminopeptidase (CD13; p150)	414	208							-
ANXA2	9	annexin A2					X
APEX1	14	APEX nuclease (multifunctional DNA repair enzyme) 1						X
ARMC5	16	armadillo repeat containing 5	13
ASAHL	4	N-acylsphingosine amidohydrolase (acid ceramidase)-like			X
ATAD2	8	ATPase family; AAA domain containing 2											X
ATN1	12	atrophin 1			X
ATP5D	19	ATP synthase; H+ trans.; mitochondrial F1 cmlpx; delta subunit						X
ATP5J	21	ATP synthase; H+ trans.; mitochondrial F0 cmplx; subunit F6	20
AURKB	17	aurora kinase B					X
AW014022	10	Corresponds to cheylorby.a									-
AW572379	17		25	86
AZGP1	7	alpha-2-glycoprotein 1; zinc		85				X	X		-	-
B2M	15	beta-2-microglobulin												X
BAG1	9	BCL2-associated athanogene												X
BAIAP2L2	22	BAI1-associated protein 2-like 2	55
BAK1	6	BCL2-antagonist/killer 1												X
bakey.a	8												X
BAP1	3	BRCA1 associated protein-1 (ubiquitin carboxy-terminal hydrolase)						X
BCS1L	2	BCS1-like (yeast)								X
BE144297	8												X
BENE	2	BENE protein							X
BGN	X	biglycan		172				X
BIRC7	20	baculoviral IAP repeat-containing 7 (livin)											X
BTBD14B	19	BTB (POZ) domain containing 14B	44
BUB1	2	BUB1 budding uninhibited by benzimidazoles 1							X
BX096646	4	Within intron of SEPT11							X
C17orf56	17	chromosome 17 open reading frame 56	43
Table S2 (continued)
Gene Symbol1	Chromosome	Gene Description	Selection Criteria: Associated with Prostate Cancer											Other Controls12
			Mayo/Univ. of MN Partnership Ranking2		Oncomine - PSA Recurrence3	Oncomine4	Literature Review5	Microarray Articles6	Panel Genes7	Mayo/Univ. of MN Partnership Data			Mayo Interest11
			GP3 vs. GP5	GP3 vs. GP5 + Met						No Met. vs. Met.8	Turned On or Off9	Maximum or Minimum10
C1orf115	1	chromosome 1 open reading frame 115	64	393
C1orf77	1	chromosome 1 open reading frame 77			X
C2orf33	2	chromosome 2 open reading frame 33							X
C3orf14	3	chromosome 3 open reading frame 14									-
C8orf32	8	chromosome 8 open reading frame 32											X
C8orf53	8	chromosome 8 open reading frame 53											X
C8orf76	8	chromosome 8 open reading frame 76											X
CAMTA1	1	calmodulin binding transcription activator 1	54
CCK	3	cholecystokinin									-
CCNB1	5	cyclin B1							X
CCNC	6	cyclin C												X
CD38	4	CD38 antigen (p45)									-
CD4	12	CD4 antigen (p55)							X
CD44	11	CD44 antigen (Indian blood group)	233				X
CD69	12	CD69 antigen (p60; early T-cell activation antigen)						X
CDC42EP2	11	CDC42 effector protein (Rho GTPase binding) 2	32
CDC42EP5	19	CDC42 effector protein (Rho GTPase binding) 5	302	36							-
CDKN3	14	cyclin-dependent kinase inhibitor 3				X
CDS2	20	phosphatidate cytidylyltransferase 2							X
Cep70	3	centrosomal protein 70kDa	76
CES1	16	carboxylesterase 1 (monocyte/macrophage serine esterase 1)							X
CHAF1A	19	chromatin assembly factor 1, subunit A (p150)							X
CHGA	14	chromogranin A						X	X
CHRAC1	8	chromatin accessibility complex 1											X
CLU	8	clusterin (complement lysis inhibitor)	227	74
CNN1	19	calponin 1; basic; smooth muscle				X
COL1A2	7	alpha 2 type I collagen		329				X	X
COMMD5	8	COMM domain containing 5											X
COPB2	3	coatomer protein complex, subunit beta 2	39
COPS5	8	COP9 constitutive photomorphogenic homolog subunit 5											X
CPEB3	10	cytoplasmic polyadenylation element binding protein 3	29
CRIP1	14	cysteine-rich protein 1 (intestinal)		362								+
CRISP3	6	cysteine-rich secretory protein 3									+
CSTB	21	cystatin B (stefin B)	74	230
CTHRC1	8	collagen triple helix repeat containing 1	485	52
CTNNB1	3	catenin (cadherin-associated protein); beta 1; 88kDa												X
CTSB	8	cathepsin B											X
CV364590	8												X
CXCL14	5	chemokine (C-X-C motif) ligand 14									+
CYB5A	18	cytochrome b5 type A (microsomal)										+
Table S2 (continued)
Gene Symbol1	Chromosome	Gene Description	Selection Criteria: Associated with Prostate Cancer											Other Controls12
			Mayo/Univ. of MN Partnership Ranking2		Oncomine - PSA Recurrence3	Oncomine4	Literature Review5	Microarray Articles6	Panel Genes7	Mayo/Univ. of MN Partnership Data			Mayo Interest11
			GP3 vs. GP5	GP3 vs. GP5 + Met						No Met. vs. Met.8	Turned On or Off9	Maximum or Minimum10
CYP27A1	2	cytochrome P450; family 27; subfamily A; polypeptide 1						X
CYP2C9	10	cytochrome P450; family 2; subfamily C; polypeptide 9	68
CYP3A5	7	cytochrome P450; family 3; subfamily A; polypeptide 5									-
dastuby	5		90
DCI	16	dodecenoyl-Coenzyme A delta isomerase						X
DDC	7	dopa decarboxylase (aromatic L-amino acid decarboxylase)										+
DDEF1	8	development and differentiation enhancing factor 1											X
DECR2	16	2;4-dienoyl CoA reductase 2; peroxisomal						X		X
DENND3	8	DENN/MADD domain containing 3											X
DEPDC6	8	DEP domain containing 6											X
DGKA	12	diacylglycerol kinase; alpha 80kDa						X
DHX9	13	DEAH (Asp-Glu-Ala-His) box polypeptide 9	50	93	X	X
DIO2	14	deiodinase; iodothyronine; type II						X
DIRAS3	1	DIRAS family; GTP-binding RAS-like 3												X
DKFZP564O0823	4	DKFZP564O0823 protein							X
DLGAP1	18	discs; large (Drosophila) homolog-associated protein 1		48
DNAJB1	19	DnaJ (Hsp40) homolog, subfamily B, member 1							X
DOCK5	8	dedicator of cytokinesis 5	121	79
DSP	6	desmoplakin												X
DYRK2	12	dual-specificity tyrosine-(Y)-phosphorylation regulated kinase 2	21	30
E2F4	16	E2F transcription factor 4; p107/p130-binding											X
EDG7.a	1	endothelial differentiation, lysophosphatidic									-
EDNRA	4	endothelin receptor type A							X
EDNRB	13	endothelin receptor type B					X
EEF1A1	6	eukaryotic translation elongation factor 1 alpha 1	107	47
EFS	14	embryonal Fyn-associated substrate									-
EGFR	7	epidermal growth factor receptor (erythroblastic leukemia viral												X
EGR2	10	early growth response 2 (Krox-20 homolog; Drosophila)						X
EGR3	8	early growth response 3						X
EHMT1	9	euchromatic histone-lysine N-methyltransferase 1	28
EHMT2	6	euchromatic histone-lysine N-methyltransferase 2			X
EIF2C2	8	eukaryotic translation initiation factor 2C; 2											X
EIF3S3	8	eukaryotic translation initiation factor 3; subunit 3 gamma; 40kDa											X
ELL3	15	elongation factor RNA polymerase II-like 3								X
EMP2	16	epithelial membrane protein 2							X
ENPP2	8	ectonucleotide pyrophosphatase/phosphodiesterase 2 (autotaxin)											X
ENY2	8	enhancer of yellow 2 homolog (Drosophila)											X
EPHA1	7	EPH receptor A1												X
EPHB4	7	EPH receptor B4												X
EPN1	19	epsin 1	69
Table S2 (continued)
Gene Symbol1	Chromosome	Gene Description	Selection Criteria: Associated with Prostate Cancer											Other Controls12
			Mayo/Univ. of MN Partnership Ranking2		Oncomine - PSA Recurrence3	Oncomine4	Literature Review5	Microarray Articles6	Panel Genes7	Mayo/Univ. of MN Partnership Data			Mayo Interest11
			GP3 vs. GP5	GP3 vs. GP5 + Met						No Met. vs. Met.8	Turned On or Off9	Maximum or Minimum10
EPPK1	8	epiplakin 1											X
EPS15	1	epidermal growth factor receptor pathway substrate 15												X
ERG	21	v-ets erythroblastosis virus E26 oncogene like (avian)									+
ERG_SV	21	Within intron of ERG									+
ERN2	16	endoplasmic reticulum to nucleus signalling 2	53
ESR2	14	estrogen receptor 2 (ER beta)											X
ETV1	7	ets variant gene 1										+
ETV4_X	22	Only exons 3-13											X
ETV6	12	ets variant gene 6 (TEL oncogene)												X
EVX1	7	eve; even-skipped homeobox homolog 1 (Drosophila)	83
EZH2	7	enhancer of zeste homolog 2 (Drosophila)					X
F2R	5	coagulation factor II (thrombin) receptor						X
F5	1	coagulation factor V (proaccelerin; labile factor)						X			+
FAM13C1	10	family with sequence similarity 13; member C1		62
FAM49B	8	family with sequence similarity 49; member B											X
FAM84B	8	family with sequence similarity 84; member B											X
FAM8A1	6	family with sequence similarity 8; member A1	86	58
FAM91A1	8	family with sequence similarity 91; member A1											X
FAS	10	Fas (TNF receptor superfamily; member 6)					X
FASN	17	fatty acid synthase (FASN)						X
FBLN1	22	fibulin 1		268							-
FBXO32	8	F-box protein 32											X
FBXW11	5	F-box and WD-40 domain protein 11			X
FDPS	1	farnesyl diphosphate synthase											X
FEV	2	FEV (ETS oncogene family)	189	24
FGFR2	10	fibroblast growth factor receptor 2							X
FLCN	17	folliculin	85
FLJ12193	8	hypothetical protein FLJ12193											X
FLJ21749	11	hypothetical protein FLJ21749	87
FLJ30655	4	hypothetical protein FLJ30655	60	346
FLJ36036	3	hypothetical protein FLJ30655										+
FLJ90231	11	hypothetical protein FLJ90231	261	17
FLJ90709	5	hypothetical protein FLJ90709								X
FLRT3	20	fibronectin leucine rich transmembrane protein 3									-
FMO5	1	flavin containing monooxygenase 5	1	2
FMOD	1	fibromodulin	438	35
FOLH1	11	folate hydrolase (prostate-specific membrane antigen) 1						X
FOS	14	v-fos FBJ murine osteosarcoma viral oncogene							X
FXYD3	19	FXYD domain containing ion transport regulator 3										-
GABRG2	5	gamma-aminobutyric acid (GABA) A receptor; gamma 2							X
Table S2 (continued)
Gene Symbol1	Chromosome	Gene Description	Selection Criteria: Associated with Prostate Cancer											Other Controls12
			Mayo/Univ. of MN Partnership Ranking2		Oncomine - PSA Recurrence3	Oncomine4	Literature Review5	Microarray Articles6	Panel Genes7	Mayo/Univ. of MN Partnership Data			Mayo Interest11
			GP3 vs. GP5	GP3 vs. GP5 + Met						No Met. vs. Met.8	Turned On or Off9	Maximum or Minimum10
gawra	16	Overlaps XYLT1		33
GBL	16	G protein beta subunit-like							X
GBX2	2	gastrulation brain homeo box 2							X
GDAP1	8	ganglioside-induced differentiation-associated protein 1							X
GDEP	4	hypothetical protein LOC118425									-
GDF15	19	growth differentiation factor 15							X
GEMIN4	17	gem (nuclear organelle) associated protein 4		88
GLRX2	1	glutaredoxin 2								X
GLUD1	10	glutamate dehydrogenase 1	36	219
GMNN	6	geminin; DNA replication inhibitor	363	38
GNA15	19	guanine nucleotide binding protein (G protein); alpha 15 (Gq class)						X
GNAS	20	GNAS complex locus	72
GNB1	1	guanine nucleotide binding protein (G protein); beta polypeptide 1	59	323
GNE	9	glucosamine (UDP-N-acetyl)-2-epimerase	142	8
GNPTAB	12	N-acetylglucosamine-1-phosphate transferase; a and b subunits	6	7
GOLPH2	9	golgi phosphoprotein 2						X
GPR137B	1	G protein-coupled receptor 137B	61	19
GRB2	17	growth factor receptor-bound protein 2												X
GRB7	17	growth factor receptor-bound protein 7												X
GREM2	1	gremlin 2 homolog, cysteine knot superfamily							X
GSK3A	19	glycogen synthase kinase 3 alpha	71
GSTT1	22	glutathione S-transferase theta 1									-
gula.shed1.a													X
GUSB	7	glucuronidase; beta												X
H51359	2	About 3kb downstream of CACNB4							X
hanera	8	Within intron of TRPS1											X
HAS2	8	hyaluronan synthase 2											X
hCAP	11	KIAA0056 protein	340	14
HCFC1	X	host cell factor C1 (VP16-accessory protein)							X
HDAC7A	12	histone deacetylase 7A	40
HDAC9	7	histone deacetylase 9						X
HMBS	11	hydroxymethylbilane synthase												X
HMGCR	5	3-hydroxy-3-methylglutaryl-Coenzyme A reductase						X
HOOK1	1	hook homolog 1 (Drosophila)		436						X
HOXC6	12	homeobox C6	409					X	X		-
HPN	19	hepsin (transmembrane protease; serine 1)					X	X
HPRT1	X	hypoxanthine phosphoribosyltransferase 1 (Lesch-Nyhan syndrome)												X
HSD17B4	5	hydroxysteroid (17-beta) dehydrogenase 4						X
HSD17B6	12	hydroxysteroid (17-beta) dehydrogenase 6									-
HSF4	16	heat shock transcription factor 4	80	409
Table S2 (continued)
Gene Symbol1	Chromosome	Gene Description	Selection Criteria: Associated with Prostate Cancer											Other Controls12
			Mayo/Univ. of MN Partnership Ranking2		Oncomine - PSA Recurrence3	Oncomine4	Literature Review5	Microarray Articles6	Panel Genes7	Mayo/Univ. of MN Partnership Data			Mayo Interest11
			GP3 vs. GP5	GP3 vs. GP5 + Met						No Met. vs. Met.8	Turned On or Off9	Maximum or Minimum10
HSPB1	7	heat shock 27kDa protein 1											X
HTR2B	2	5-hydroxytryptamine (serotonin) receptor 2B						X
IER3	6	immediate early response 3							X
IFNGR2	21	interferon gamma receptor 2 (interferon gamma transducer 1)												X
IGFBP3	7	insulin-like growth factor binding protein 3	138	10					X
IGFBP6	12	insulin-like growth factor binding protein 6												X
IL6R	1	interleukin 6 receptor											X
IMMT	2	inner membrane protein; mitochondrial (mitofilin)	405	46
INHBA	7	inhibin; beta A (activin A; activin AB alpha polypeptide)	3	107
ISL1	5	ISL1 transcription factor; LIM/homeodomain; (islet-1)				X
ITGAV	2	integrin; alpha V (vitronectin receptor)								X
ITGB3	17	integrin; beta 3 (platelet glycoprotein IIIa; antigen CD61)	49
ITPKA	15	inositol 1;4;5-trisphosphate 3-kinase A			X
ITPR1	3	inositol 1,4,5-triphosphate receptor, type 1							X
ITPR3	6	inositol 1,4,5-triphosphate receptor, type 3						X	X
jerflee	5	Within intron of SH3RF2		89
JMJD2B	19	jumonji domain containing 2B	4
JUN	1	v-jun sarcoma virus 17 oncogene homolog (avian)												X
JUNB	19	jun B proto-oncogene							X
JUND	19	jun D proto-oncogene												X
KHDRBS3	8	KH domain containing; RNA bind.; signal transduction assoc. 3		126							+
KIAA0196	8	KIAA0196											X
KIAA0476	1	KIAA0476							X
KIAA0922	4	KIAA0922 protein	26	6
KIAA1211	4	KIAA1211	299	26
KIAA1324	1	KIAA1324										-
KIAA1333	14	KIAA1333	91
KIFC2	8	kinesin family member C2											X
kimore	8	Within intron of DDEF1											X
KLF6	10	Kruppel-like factor 6					X		X
KLHDC4	16	kelch domain containing 4							X
KLK2	19	kallikrein 2; prostatic		105			X
KLK3	19	kallikrein 3; (prostate specific antigen)					X
KLK4	19	kallikrein 4 (prostase; enamel matrix; prostate)											X
KNTC2	18	kinetochore associated 2							X
KPNB1	17	karyopherin (importin) beta 1			X
KRT15	17	keratin 15							X		-
KRT5	12	keratin 5 (epidermolysis bullosa simplex)									-
LEPREL1	3	leprecan-like 1									-
LGR4	11	leucine-rich repeat-containing G protein-coupled receptor 4	81
Table S2 (continued)
Gene Symbol1	Chromosome	Gene Description	Selection Criteria: Associated with Prostate Cancer											Other Controls12
			Mayo/Univ. of MN Partnership Ranking2		Oncomine - PSA Recurrence3	Oncomine4	Literature Review5	Microarray Articles6	Panel Genes7	Mayo/Univ. of MN Partnership Data			Mayo Interest11
			GP3 vs. GP5	GP3 vs. GP5 + Met						No Met. vs. Met.8	Turned On or Off9	Maximum or Minimum10
LOC257407	2	hypothetical protein LOC257407	411	66
LOC283177	11	hypothetical protein LOC283177	15	3
LOC339942	3	hypothetical protein LOC339942	22
LOC400027	12	hypothetical protein LOC400027	45
LOC89944	11	hypothetical protein LOC89944		60
LOC92689	4	hypothetical protein LOC92689							X
LOX	5	lysyl oxidase						X	X
LPHN3	4	latrophilin 3 precursor							X
LSAMP	3	limbic system-associated membrane protein									-
LTBP2	14	latent transforming growth factor beta binding	143	5					X
LTF	3	lactotransferrin									-
MAOB	X	monoamine oxidase B; nuclear gene encoding mitochondrial protein				X
MAPK1	22	mitogen-activated protein kinase 1											X
MAPK3	16	mitogen-activated protein kinase 3											X
MAPRE2	18	microtubule-associated protein; RP/EB family; member 2			X
MARCKSL1	1	MARCKS-like 1						X
MARVELD3	16	MARVEL domain containing 3		73
mayora	3		30
MCM7	7	MCM7 minichromosome maintenance deficient 7 (S. cerevisiae)					X
meelar.d	9										-
MEF2C	5	MADS box transcription enhancer factor 2; polypeptide C				X
MEIS2	15	Meis1; myeloid ecotropic viral integration site 1 homolog 2 (mouse)							X
MET	7	met proto-oncogene (hepatocyte growth factor receptor)					X
MGC14595.a	8	hypothetical protein MGC14595											X
MGC15523	17	hypothetical protein MGC15523	23
MGC26694	19	hypothetical protein MGC26694		83
MGC4677	2	hypothetical protein MGC4677	267	34
MGC5466	15	hypothetical protein MGC5466							X
MGC9712	7	hypothetical protein MGC9712	62
MKI67	10	antigen identified by monoclonal antibody Ki-67					X		X
MLL	11	myeloid/lymphoid or mixed-lineage leukemia (trithorax homolog)												X
MLLT4	6	myeloid/lymphoid or mixed-lineage leukemia												X
MPP7	10	membrane protein; palmitoylated 7							X
MRPL13	8	mitochondrial ribosomal protein L13											X
MSMB	10	microseminoprotein; beta-										-
MSR1	8	macrophage scavenger receptor 1					X
MTHFR	1	5;10-methylenetetrahydrofolate reductase (NADPH)												X
MTPN	7	myotrophin		53
MTR	1	5-methyltetrahydrofolate-homocysteine methyltransferase						X
MTSS1	8	metastasis suppressor 1											X
Table S2 (continued)
Gene Symbol1	Chromosome	Gene Description	Selection Criteria: Associated with Prostate Cancer											Other Controls12
			Mayo/Univ. of MN Partnership Ranking2		Oncomine - PSA Recurrence3	Oncomine4	Literature Review5	Microarray Articles6	Panel Genes7	Mayo/Univ. of MN Partnership Data			Mayo Interest11
			GP3 vs. GP5	GP3 vs. GP5 + Met						No Met. vs. Met.8	Turned On or Off9	Maximum or Minimum10
muroro	1	About 2.3kb downstream of CHRM3									+
MXD1	2	MAX dimerization protein 1												X
MYBPC1	12	myosin binding protein C; slow type		84
MYC	8	v-myc myelocytomatosis viral oncogene homolog (avian)					X
MYCN	2	v-myc myelocytomatosis viral related oncogene												X
MYH11	16	myosin; heavy polypeptide 11; smooth muscle		340		X						-
MYLK	3	myosin; light polypeptide kinase			X
NBL1	1	neuroblastoma; suppression of tumorigenicity 1			X
NDRG1	8	N-myc downstream regulated gene 1											X
NDUFB9	8	NADH dehydrogenase (ubiquinone) 1 beta subcomplex; 9; 22kDa											X
NEFH	22	neurofilament; heavy polypeptide 200kDa							X
NETO2	16	neuropilin (NRP) and tolloid (TLL)-like 2							X
NKX3	8	NK3 transcription factor related; locus 1 (Drosophila)					X
NOV	8	nephroblastoma overexpressed gene											X
NOX4	11	NADPH oxidase 4						X
NPEPL1	20	aminopeptidase-like 1	57
NR4A1	12	nuclear receptor subfamily 4; group A; member 1				X
NRP1	10	neuropilin 1	461	40				X
NUP98	11	nucleoporin 98kDa	84
nuwarbo	9	Within intron of ABCA1	41
NYD	4	NYD-SP14 protein										+
OAZ2	15	ornithine decarboxylase antizyme 2			X
OPRS1	9	opioid receptor; sigma 1							X
PAGE4	X	P antigen family; member 4 (prostate associated)	250	31		X
PAPD1	10	PAP associated domain containing 1								X
PARD3	10	par-3 partitioning defective 3 homolog (C. elegans)								X
PART1	5	prostate androgen-regulated transcript 1					X
PASK	2	PAS domain containing serine/threonine kinase		13
PBOV1	6	prostate and breast cancer overexpressed 1											X
PCGEM1	2	prostate-specific non-coding gene on chromosome 2					X
PDGFRA	4	platelet-derived growth factor receptor; alpha polypeptide												X
PDGFRB	5	platelet-derived growth factor receptor beta						X	X
PDIA5	3	protein disulfide isomerase family A; member 5		20
PDLIM5	4	PDZ and LIM domain 5						X
PEBP4.a	8	phosphatidylethanolamine-binding protein 4					X
PEMT	17	phosphatidylethanolamine N-methyltransferase	455	43
PGF	14	placental growth factor												X
PGK1	X	phosphoglycerate kinase 1												X
PHACTR2	6	phosphatase and actin regulator 2							X
PHF20L1	8	PHD finger protein 20-like 1											X
Table S2 (continued)
Gene Symbol1	Chromosome	Gene Description	Selection Criteria: Associated with Prostate Cancer											Other Controls12
			Mayo/Univ. of MN Partnership Ranking2		Oncomine - PSA Recurrence3	Oncomine4	Literature Review5	Microarray Articles6	Panel Genes7	Mayo/Univ. of MN Partnership Data			Mayo Interest11
			GP3 vs. GP5	GP3 vs. GP5 + Met						No Met. vs. Met.8	Turned On or Off9	Maximum or Minimum10
PHF8	X	PHD finger protein 8		70
PHLDA2	11	pleckstrin homology-like domain; family A; member 2						X
PIAS2	18	protein inhibitor of activated STAT2	27	205
PIK3CD	1	phosphoinositide-3-kinase; catalytic; delta polypeptide			X
PKHD1L1	8	polycystic kidney and hepatic disease 1 (autosomal recessive)-like 1											X
PLA2G7	6	phospholipase A2; group VII						X
plardarby	13	Within intron of ABCC4		49
PLXDC1	17	plexin domain containing 1	202	65
POLR1C	6	polymerase (RNA) I polypeptide C; 30kDa								X
POSTN	13	periostin, osteoblast specific factor							X
POU2F1	1	POU domain; class 2; transcription factor 1			X
PPFIA3	19	PTPRF interacting protein alpha 3							X
PPIA	7	peptidylprolyl isomerase A (cyclophilin A)	354											X
PRIC285	20	PPAR-alpha interacting complex protein 285							X
PRSS8	16	protease; serine; 8											X
PSCA	8	prostate stem cell antigen					X
PTCH2	1	patched homolog 2 (Drosophila)												X
PTGER3	1	prostaglandin E receptor 3 (subtype EP3)										+
PTK2.s	8	PTK2 protein tyrosine kinase 2											X
PTN	7	pleiotrophin									-
PTP4A3	8	protein tyrosine phosphatase type IVA; member 3											X
PTPLB	3	protein tyrosine phosphatase-like								X
PTPRN2	7	protein tyrosine phosphatase; receptor type; N polypeptide 2	99	80
PURA	5	purine-rich element binding protein A												X
PYCR1	17	pyrroline-5-carboxylate reductase 1						X
PYCRL	8	pyrroline-5-carboxylate reductase-like											X
RAB8A	19	RAB8A; member RAS oncogene family (MEL)												X
RABEP2	16	rabaptin; RAB GTPase binding effector protein 2	9
RAD21	8	RAD21 homolog (S. pombe)											X
ranira	8	Immediately downstream of ST3GAL1											X
RAP2B	3	RAP2B; member of RAS oncogene family	430	16
RARA	17	retinoic acid receptor; alpha	429											X
RDH11	14	retinol dehydrogenase 11 (all-trans and 9-cis) (ARSDR1)						X
RECQL4	8	RecQ protein-like 4											X
RELA	11	v-rel reticuloendotheliosis viral oncogene homolog A												X
REPS2	X	RALBP1 associated Eps domain containing 2	421	12
RGS1	1	regulator of G-protein signalling 1	38
RHOA	3	ras homolog gene family; member A												X
RIPK1	6	receptor (TNFRSF)-interacting serine-threonine kinase 1												X
RLN1	9	relaxin 1									-
Table S2 (continued)
Gene Symbol1	Chromosome	Gene Description	Selection Criteria: Associated with Prostate Cancer											Other Controls12
			Mayo/Univ. of MN Partnership Ranking2		Oncomine - PSA Recurrence3	Oncomine4	Literature Review5	Microarray Articles6	Panel Genes7	Mayo/Univ. of MN Partnership Data			Mayo Interest11
			GP3 vs. GP5	GP3 vs. GP5 + Met						No Met. vs. Met.8	Turned On or Off9	Maximum or Minimum10
RNASEL	1	ribonuclease L (2';5'-oligoisoadenylate synthetase-dependent)					X
RNF139	8	ring finger protein 139											X
RNF185	22	ring finger protein 185	355	81
RNF2	1	ring finger protein 2							X
RRAGC	1	Ras-related GTP binding C		77
SAMD12	8	sterile alpha motif domain containing 12											X
sarroybu	20	About 0.5kb downstream of MYL9		46
SCARB2	4	scavenger receptor class B; member 2	264	32
SCD5	4	stearoyl-CoA desaturase 5	47	188
SCNN1A	12	sodium channel; nonvoltage-gated 1 alpha	89		X
SCRIB	8	scribbled homolog (Drosophila)											X
SDC2	8	syndecan 2	42	306
SDHB	1	succinate dehydrogenase complex; subunit B; iron sulfur (Ip)	14
SDHC	1	succinate dehydrogenase complex; subunit C	73
SEC14L1	17	SEC14-like 1 (S. cerevisiae)	219	22
SERPINB5	18	serpin peptidase inhibitor; clade B (ovalbumin); member 5					X
SESN3.a	11	sestrin 3		82
SF1	11	splicing factor 1			X
SFRP4	7	secreted frizzled-related protein 4	17
SH3RF2.a	5	SH3 domain containing ring finger 2		54
shawta	X	About 2kb downstream of REPS2		23
SIAHBP1	8	fuse-binding protein-interacting repressor											X
SKIL	3	SKI-like												X
SLC14A1	18	solute carrier family 14 (urea transporter); member 1									-
SLC20A1	2	solute carrier family 20 (phosphate transporter); member 1		76
SLC43A1	11	solute carrier family 43; member 1	16	1
SLC44A1	9	solute carrier family 44; member 1	7	354
SLC45A3	1	solute carrier family 45; member 3										-
SMARCC1	3	SWI/SNF rel.;matrix ass..;actin dep. reg. of chromatin;subf.c;mem.1	67
SMPDL3B	1	sphingomyelin phosphodiesterase; acid-like 3B	345	44
SNRPE	1	small nuclear ribonucleoprotein polypeptide E			X
SNTB1	8	syntrophin; beta 1		158									X
SNTB2	16	syntrophin; beta 2								X
SNTG1	8	syntrophin; gamma 1	52
SOCS7	17	suppressor of cytokine signaling 7			X
SOD1	21	superoxide dismutase 1; soluble												X
SORD	15	sorbitol dehydrogenase										-
SOX15	17	SRY (sex determining region Y)-box 15	33
SPDEF	6	SAM pointed domain containing ets transcription factor		29
SPINT1	15	serine peptidase inhibitor; Kunitz type 1					X
Table S2 (continued)
Gene Symbol1	Chromosome	Gene Description	Selection Criteria: Associated with Prostate Cancer											Other Controls12
			Mayo/Univ. of MN Partnership Ranking2		Oncomine - PSA Recurrence3	Oncomine4	Literature Review5	Microarray Articles6	Panel Genes7	Mayo/Univ. of MN Partnership Data			Mayo Interest11
			GP3 vs. GP5	GP3 vs. GP5 + Met						No Met. vs. Met.8	Turned On or Off9	Maximum or Minimum10
SQLE	8	squalene epoxidase											X
SQRDL	15	sulfide quinone reductase-like (yeast)							X
SRD5A2	2	steroid-5-alpha-reductase; alpha polypeptide 2	35	95
ST3GAL1	8	ST3 beta-galactoside alpha-2;3-sialyltransferase 1											X
ST3GAL5	2	ST3 beta-galactoside alpha-2;3-sialyltransferase 5			X
ST6GAL1	3	sialyltransferase 1 (SAIT1)						X	X
ST7	7	suppression of tumorigenicity 7					X
STARD10	11	START domain containing 10	207	37
STEAP1	7	six transmembrane epithelial antigen of the prostate 1					X
STEAP2	7	six transmembrane epithelial antigen of the prostate 2					X
STIP1	11	stress-induced-phosphoprotein 1 (Hsp70/Hsp90-organizing protein)					X
STK6	20	serine/threonine kinase 6						X
swabley	6	Within intron of SLC22A3		63
sworarbo	1	About 0.1kb from TM7SF1	98	247
swoyswawby.a	4	Within intron of PDLIM3							X
SYT4	18	synaptotagmin IV										+
TACSTD1	2	tumor-associated calcium signal transducer 1						X
TAF1C	16	TATA box binding protein (TBP)-associated factor						X
TAF2	8	TAF2 RNA polymerase II; TATA box binding protein											X
TARP		TCR gamma alternate reading frame protein						X
TAX1BP1	7	Tax1 (human T-cell leukemia virus type I) binding protein 1			X
TBP	6	TATA box binding protein												X
TCF2	17	transcription factor 2							X
TCF7	5	transcription factor 7 (T-cell specific; HMG-box)						X
TCL6	14	T-cell leukemia/lymphoma 6							X
terparbo	2	About 0.1kb downstream of SRD5A2	58	50
TFG	3	TRK-fused gene												X
TFRC	3	transferrin receptor (p90; CD71)												X
TGFBR3	1	transforming growth factor; beta receptor III (betaglycan; 300kDa)												X
TGM2	20	transglutaminase 2											X
THBS1	15	thrombospondin 1						X
THRAP6	8	thyroid hormone receptor associated protein 6											X
THSD1	13	thrombospondin; type I; domain containing 1	108	27
TIAM1.shed1.a	21	T-cell lymphoma invasion and metastasis 1								X
TIMP1	X	TIMP metallopeptidase inhibitor 1												X
TLX1	10	T-cell leukemia homeobox 1			X
TMEM45B	11	transmembrane protein 45B									+
TMEM65.a	8	LOC157378 protein.											X
TMEM71	8	transmembrane protein 71											X
TMPRSS2	21	transmembrane protease; serine 2											X
Table S2 (continued)
Gene Symbol1	Chromosome	Gene Description	Selection Criteria: Associated with Prostate Cancer											Other Controls12
			Mayo/Univ. of MN Partnership Ranking2		Oncomine - PSA Recurrence3	Oncomine4	Literature Review5	Microarray Articles6	Panel Genes7	Mayo/Univ. of MN Partnership Data			Mayo Interest11
			GP3 vs. GP5	GP3 vs. GP5 + Met						No Met. vs. Met.8	Turned On or Off9	Maximum or Minimum10
TNFRSF11A	18	tumor necrosis factor receptor superfamily; member 11a											X
TNFRSF11B	8	tumor necrosis factor receptor superfamily; member 11b											X
TNFRSF21	6	tumor necrosis factor receptor superfamily; member 21						X
TNIP1	5	Nef-associated factor 1							X
toni	2			28
TPD52	8	tumor protein D52		210				X
TPD52L2	20	tumor protein D52-like 2											X
TPX2	20	TPX2; microtubule-associated; homolog (Xenopus laevis)						X
TRIM29	11	tripartite motif-containing 29							X
TRIM38	6	tripartite motif-containing 38								X
TRMT12	8	tRNA methyltranferase 12 homolog (S. cerevisiae)											X
TRPM8	2	transient receptor potential cation channel; subfamily M; member 8					X					-
TRPS1	8	trichorhinophalangeal syndrome I											X
TSC1	9	tuberous sclerosis 1												X
TSPAN13	7	tetraspanin 13						X
TSPAN14	10	tetraspanin 14								X
TSTA3	8	tissue specific transplantation antigen P35B											X
TUBB	6	tubulin; beta							X
UBE2J2	1	ubiquitin-conjugating enzyme E2; J2 (UBC6 homolog; yeast)	24
UBE2L6	11	ubiquitin-conjugating enzyme E2L 6							X
USP22	17	ubiquitin specific protease 22							X
VAMP2	17	vesicle-associated membrane protein 2 (synaptobrevin 2)			X
VEGFB	11	vascular endothelial growth factor B												X
VGLL3	3	vestigial like 3 (Drosophila); colon carcinoma related protein									-
voswerby.a	3											+
WAS	X	Wiskott-Aldrich syndrome (eczema-thrombocytopenia)			X
WDR67	8	WD repeat domain 67											X
WISP1	8	WNT1 inducible signaling pathway protein 1		51
WISP1.a	8	3'-UTR											X
WNT5A	3	wingless-type MMTV integration site family; member 5A							X
XDH	2	xanthine dehydrogenase	65	281
yamura	6		385	97
YIPF1	1	Yip1 domain family; member 1		57
yuke.a	4							X
yumara	3	About 0.4kb downstream of LSAMP									-
YWHAB	20	tyrosine 3-monooxygenase; beta polypeptide	18	99
YWHAZ	10	tyrosine 3-monooxygenase; zeta polypeptide				X
ZFP36	19	zinc finger protein 36, C3H type, homolog							X
ZHX1	8	zinc fingers and homeoboxes 1											X
ZNF251	8	zinc finger protein 251											X
Table S2 (continued)
Gene Symbol1	Chromosome	Gene Description	Selection Criteria: Associated with Prostate Cancer											Other Controls12
			Mayo/Univ. of MN Partnership Ranking2		Oncomine - PSA Recurrence3	Oncomine4	Literature Review5	Microarray Articles6	Panel Genes7	Mayo/Univ. of MN Partnership Data			Mayo Interest11
			GP3 vs. GP5	GP3 vs. GP5 + Met						No Met. vs. Met.8	Turned On or Off9	Maximum or Minimum10
ZNF313	20	zinc finger protein 313	240	78
ZNF34	8	zinc finger protein 34 (KOX 32)											X
ZNF511	10	zinc finger protein 511		67
ZNF655	7	zinc finger protein 655							X
ZNF7	8	zinc finger protein 7 (KOX 4; clone HF.16)											X
zuplabu.a	9		2	9
1 The symbol listed can be found by searching the May 2004 assembly at http://genome.ucsc.edu/cgi-bin/hgGateway.
2 RNA was extracted from laser capture microdissected frozen tissue from single tumor foci. After linear amplification of RNA, expression levels were measured using the GeneChipTM Human Genome U133 Plus 2.0 Array produced by Affymetrix (Santa Clara, CA). P-values were calculated using a two-tail t-test to compare the expression values from 31 samples of Gleason grade 3 foci versus 10 samples cont…
3 The Oncomine - PSA Recurrence list was prepared using data from four studies for which a comparison of gene expression of primary prostate adenocarcinomas with and without PSA recurrence was available. Probes showing differential expression were ranked by increasing p-values (two-tail t-test). Genes having probe sets that were in the top 200 for two or more studies are marked with an X.
Dhanasekaran SM, Barrette TR, Ghosh D, Shah R, Varambally S, Kurachi K, Pienta KJ, Rubin MA, Chinnaiyan AM. Delineation of prognostic biomarkers in prostate cancer. Nature. 2001 Aug 23; 412(6849):822-6.
Glinsky GV, Glinskii AB, Stephenson AJ, Hoffman RM, Gerald WL. Gene expression profiling predicts clinical outcome of prostate cancer. J Clin Invest. 2004 Mar;113(6):913-23.
LaTulippe E, Satagopan J, Smith A, Scher H, Scardino P, Reuter V, Gerald WL. Comprehensive gene expression analysis of prostate cancer reveals distinct transcriptional programs associated with metastatic disease. Cancer Res. 2002 Aug 1; 2(15):4499-506.
Singh D, Febbo PG, Ross K, Jackson DG, Manola J, Ladd C, Tamayo P, Renshaw AA, D'Amico AV, Richie JP, Lander ES, Loda M, Kantoff PW, Golub TR, Sellers WR. Gene expression correlates of clinical prostate cancer behavior. Cancer Cell. 2002 Mar;1(2):203-9.
4 The Oncomine list was prepared using data from nine studies for which a comparison of stage (T2 vs. T3), Gleason score (<=7 vs. >=8), PSA recurrence and/or primary cancer versus metastases was available. Probes showing differential expression were ranked by increasing p-values (two-tail t-test). Genes having probe sets that were in the top 100 for three or more studies are marked with an X.
In addition to the 4 references above3, the following studies were used.
Lapointe J, Li C, Higgins JP, van de Rijn M, Bair E, Montgomery K, Ferrari M, Egevad L, Rayford W, Bergerheim U, Ekman P, DeMarzo AM, Tibshirani R, Botstein D, Brown PO, Brooks JD, Pollack JR. Gene expression profiling identifies clinically relevant subtypes of prostate cancer. Proc Natl Acad Sci U S A. 2004 Jan 20;101(3):811-6.
Luo J, Duggan DJ, Chen Y, Sauvageot J, Ewing CM, Bittner ML, Trent JM, Isaacs WB. Human prostate cancer and benign prostatic hyperplasia: molecular dissection by gene expression profiling. Cancer Res. 2001 Jun 15;61(12):4683-8.
Magee JA, Araki T, Patil S, Ehrig T, True L, Humphrey PA, Catalona WJ, Watson MA, Milbrandt J. Expression profiling reveals hepsin overexpression in prostate cancer. Cancer Res. 2001 Aug 1; 61(15):5692-6.
Welsh JB, Sapinoso LM, Su AI, Kern SG, Wang-Rodriguez J, Moskaluk CA, Frierson HF Jr, Hampton GM. Analysis of gene expression identifies candidate markers and pharmacological targets in prostate cancer. Cancer Res. 2001 Aug 15;61(16):5974-8.
Yu YP, Landsittel D, Jing L, Nelson J, Ren B, Liu L, McDonald C, Thomas R, Dhir R, Finkelstein S, Michalopoulos G, Becich M, Luo JH. Gene expression alterations in prostate cancer predicting tumor aggression and preceding development of malignancy. J Clin Oncol. 2004 Jul 15;22(14):2790-9.
5 These genes were identified via a search of 12 articles reviewing genes associated with prostate cancer. Only genes occurring in two or more papers are marked with an X.
Karan D, Lin MF, Johansson SL, Batra SK. Current status of the molecular genetics of human prostatic adenocarcinomas. Int J Cancer. 2003 Jan 20;103(3):285-93.
Visakorpi T. The molecular genetics of prostate cancer. Urology. 2003 Dec 29;62 Suppl 1:19-35.
Tricoli JV, Schoenfeldt M, Conley BA. Detection of prostate cancer and predicting progression: current and future diagnostic markers. Clinical Cancer Research Vol. 10, 3943-3953, June 15, 2004.
Montironi R, Scarpelli M, Lopez Beltran A. Carcinoma of the prostate: inherited susceptibility, somatic gene defects and androgen receptors. Virchows Arch. 2004 Jun;444(6):503-8.
Foley R, Hollywood D, Lawler M. Molecular pathology of prostate cancer: the key to identifying new biomarkers of disease. Endocrine-Related Cancer (2004) 11, 477-488.
Watson RW, Schalken JA. Future opportunities for the diagnosis and treatment of prostate cancer. Prostate Cancer Prostatic Dis. 2004: 7, S8-S13.
De Marzo AM, DeWeese TL, Platz EA, Meeker AK, Nakayama M, Epstein JI, Isaacs WB, Nelson WG. Pathological and molecular mechanisms of prostate carcinogenesis: implications for diagnosis, detection, prevention, and treatment. J Cell Biochem. 2004 Feb 15;91(3):459-77.
Porkka KP, Visakorpi T. Molecular mechanisms of prostate cancer. Eur Urol. 2004 Jun;45(6):683-91.
Eder IE, Bektic J, Haag P, Bartsch G, Klocker H. Genes differentially expressed in prostate cancer. BJU Int. 2004 May;93(8):1151-5.
Karayi MK, Markham AF. Molecular biology of prostate cancer. Prostate Cancer Prostatic Dis. 2004;7(1):6-20.
Hughes C, Murphy A, Martin C, Sheils O, O'Leary J. Molecular pathology of prostate cancer. J Clin Pathol. 2005 Jul;58(7):673-84.
Table S2 (continued)
Rubin MA, De Marzo AM. Molecular genetics of human prostate cancer. Mod Pathol. 2004 Mar;17(3):380-8.
Gonzalgo ML, Isaacs WB. Molecular pathways to prostate cancer. J Urol. 2003 Dec;170(6 Pt 1):2444-52.
6 These genes were identified via a search of 13 articles reporting microarray results from prostate cancer cases. Genes occurring in tables in two or more papers and genes that are linked to prostate cancer agressiveness are marked with an x.
Dhanasekaran SM, Barrette TR, Ghosh D, Shah R, Varambally S, Kurachi K, Pienta KJ, Rubin MA, Chinnaiyan AM. Delineation of prognostic biomarkers in prostate cancer. Nature. 2001 Aug 23;412(6849): 822-6.
Welsh JB, Sapinoso LM, Su AI, Kern SG, Wang-Rodriguez J, Moskaluk CA, Frierson HF Jr, Hampton GM. Analysis of gene expression identifies candidate markers and pharmacological targets in prostate cancer. Cancer Res. 2001 Aug 15;61(16):5974-8.
Luo J, Duggan DJ, Chen Y, Sauvageot J, Ewing CM, Bittner ML, Trent JM, Isaacs WB. Human prostate cancer and benign prostatic hyperplasia: molecular dissection by gene expression profiling. Cancer Res. 2001 Jun 15;61(12):4683-8.
Magee JA, Araki T, Patil S, Ehrig T, True L, Humphrey PA, Catalona WJ, Watson MA, Milbrandt J. Expression profiling reveals hepsin overexpression in prostate cancer. Cancer Res. 2001 Aug 1;61(15):5692-6.
Stamey TA, Warrington JA, Caldwell MC, Chen Z, Fan Z, Mahadevappa M, McNeal JE, Nolley R, Zhang Z. Molecular genetic profiling of Gleason grade 4/5 prostate cancers compared to benign prostatichyperplasia. J Urol. 2001 Dec;166(6):2171-7.
Bull JH, Ellison G, Patel A, Muir G, Walker M, Underwood M, Khan F, Paskins L. Identification of potential diagnostic markers of prostate cancer and prostatic intraepithelial neoplasia using cDNA microarray. Br J Cancer. 2001 Jun 1;84(11):1512-9.
Singh D, Febbo PG, Ross K, Jackson DG, Manola J, Ladd C, Tamayo P, Renshaw AA, D'Amico AV, Richie JP, Lander ES, Loda M, Kantoff PW, Golub TR, Sellers WR. Gene expression correlates of clinical prostate cancer behavior. Cancer Cell. 2002 Mar;1(2):203-9.
Luo JH, Yu YP, Cieply K, Lin F, Deflavia P, Dhir R, Finkelstein S, Michalopoulos G, Becich M. Gene expression analysis of prostate cancers. Mol Carcinog. 2002 Jan;33(1):25-35.
Ernst T, Hergenhahn M, Kenzelmann M, Cohen CD, Bonrouhi M, Weninger A, Klaren R, Grone EF, Wiesel M, Gudemann C, Kuster J, Schott W, Staehler G, Kretzler M, Hollstein M, Grone HJ. Decrease and gain of gene expression are equally discriminatory markers for prostate carcinoma: a gene expression analysis on total and microdissected prostate tissue. Am J Pathol. 2002 Jun;160(6):2169-80.
LaTulippe E, Satagopan J, Smith A, Scher H, Scardino P, Reuter V, Gerald WL. Comprehensive gene expression analysis of prostate cancer reveals distinct transcriptional programs associated with metastatic disease. Cancer Res. 2002 Aug 1;62(15):4499-506.
Chen Z, Fan Z, McNeal JE, Nolley R, Caldwell MC, Mahadevappa M, Zhang Z, Warrington JA, Stamey TA. Hepsin and maspin are inversely expressed in laser capture microdissectioned prostate cancer. J Urol. 2003 Apr;169(4):1316-9.
Best CJ, Leiva IM, Chuaqui RF, Gillespie JW, Duray PH, Murgai M, Zhao Y, Simon R, Kang JJ, Green JE, Bostwick DG, Linehan WM, Emmert-Buck MR. Molecular differentiation of high- and moderate-grade human prostate cancer by cDNA microarray analysis. Diagn Mol Pathol. 2003 Jun;12(2):63-70.
Lapointe J, Li C, Higgins JP, van de Rijn M, Bair E, Montgomery K, Ferrari M, Egevad L, Rayford W, Bergerheim U, Ekman P, DeMarzo AM, Tibshirani R, Botstein D, Brown PO, Brooks JD, Pollack JR. Gene expression profiling identifies clinically relevant subtypes of prostate cancer. Proc Natl Acad Sci U S A. 2004 Jan 20;101(3):811-6.
7 These genes were identified as members of gene expression panels that divided primary prostate adenocarcinomas into clinically relevant sub-groups.
Glinsky GV, Glinskii AB, Stephenson AJ, Hoffman RM, Gerald WL. Gene expression profiling predicts clinical outcome of prostate cancer. J Clin Invest. 2004 Mar;113(6):913-23.
Lapointe J, Li C, Higgins JP, van de Rijn M, Bair E, Montgomery K, Ferrari M, Egevad L, Rayford W, Bergerheim U, Ekman P, DeMarzo AM, Tibshirani R, Botstein D, Brown PO, Brooks JD, Pollack JR. Gene expression profiling identifies clinically relevant subtypes of prostate cancer. Proc Natl Acad Sci U S A. 2004 Jan 20;101(3):811-6.
Singh D, Febbo PG, Ross K, Jackson DG, Manola J, Ladd C, Tamayo P, Renshaw AA, D'Amico AV, Richie JP, Lander ES, Loda M, Kantoff PW, Golub TR, Sellers WR. Gene expression correlates of clinical prostate cancer behavior. Cancer Cell. 2002 Mar;1(2):203-9.
Yu YP, Landsittel D, Jing L, Nelson J, Ren B, Liu L, McDonald C, Thomas R, Dhir R, Finkelstein S, Michalopoulos G, Becich M, Luo JH. Gene expression alterations in prostate cancer predicting tumor aggression and preceding development of malignancy. J Clin Oncol. 2004 Jul 15;22(14):2790-9.
8 Using the same data set as described in,2 primary cancers in cases without metastases at time of surgery were compared to primary cancers that had metastasized at time of surgery. Genes were ranked by increasing p-value (two-tail t-test). The top 18 genes are marked with an X.
9 Using the same data set as described in,2 we compared 22 samples of normal prostate (from prostate cancer patients) to 10 samples of Gleason grade 5 foci and 7 samples that metastsized to lymph nodes. We identified 9 genes that were "off" (expression <200) in at least 1/2 of the normal samples and that were "on" (expression >1000) in at least 1/2 of the Gleason grade 5 foci or the Gleason grade…
10 Using the same data set as described in,2 we compared 22 samples of normal prostate (from prostate cancer patients), 8 samples of benign prostatic hyperplasia (BPH), 5 samples of prostate intraepithelial neoplasia (PIN) and 31 samples of Gleason grade 3 foci to 10 samples of Gleason grade 5 foci. We identified 13 genes for which the ratio of the maximum expression in the Gleason grade 5 foci w…
11 These genes are of current research interest to investigators studying prostate cancer at the Mayo Clinic and did not meet the other criteria for inclusion on the array.
12 These genes are present on both the DASLTM Cancer Panel v1 and the DASLTM Custom Array. The expression of these genes is expected to be similar across the cases/controls in this study. In a pilot study, these genes represented a range of expression signals on the DASLTM Cancer Panel v1.
