# Supplementary material for: A Tissue Biomarker Panel Predicting Systemic Progression after PSA Recurrence Post-Definitive Prostate Cancer Therapy
Source: PLoS One. 2008 May 28;3(5):e2318. doi: 10.1371/journal.pone.0002318 (PMC2565588; doi:10.1371/journal.pone.0002318)
Supplement: Table S4 — Cramér's V-statistic for selection between PSA recurrence and systemic progression. All samples are included (both training and validation sets). All models were augmented with clinical information. (0.02 MB PDF) [file pone.0002318.s009.pdf]

**Table S4: Cramér’s V-statistic for selection between PSA recurrence and systemic progression. All samples are included (both training and validation sets). All models were augmented with clinical information.**

| Model 1                                      | Model 2                |                        |                                                    |                      |                   |
|----------------------------------------------|------------------------|------------------------|----------------------------------------------------|----------------------|-------------------|
|                                              | Final 17<br>gene/probe | Glinsky<br>et al. 2005 | Lapointe<br>et al. 2004<br>recurrence<br>signature | Singh<br>et al. 2002 | Yu et al.<br>2004 |
| Truth (Known Cohort)                         | 0.50                   | 0.38                   | 0.47                                               | 0.43                 | 0.44              |
| Final 17 gene/probe                          |                        | 0.65                   | 0.64                                               | 0.70                 | 0.64              |
| Glinsky et al. 2005                          |                        |                        | 0.61                                               | 0.66                 | 0.67              |
| Lapointe et al. 2004<br>recurrence signature |                        |                        |                                                    | 0.69                 | 0.68              |
| Singh et al. 2002                            |                        |                        |                                                    |                      | 0.66              |
